# Supplementary material for: Genetic Structure and Diversity of Hatchery and Wild Populations of Yellow Catfish Tachysurus fulvidraco (Siluriformes: Bagridae) from Korea
Source: MDPI journal article supplement (doi:10.3390/ijms25073923), 2024-03-31
Supplement: s1 [file s1]

**Table S1.** Summary information of ms DNA screening and raw data of sequencing of *Tachysurus fulvidraco*.

|                                                   | Pfu01         | Pfu02         | Pfu03         | Pfu04         |
|---------------------------------------------------|---------------|---------------|---------------|---------------|
| Raw data number of read                           | 6,231,011     | 5,705,048     | 5,123,581     | 6,235,796     |
| Raw data number of bases<br>(bp)                  | 3,751,068,622 | 3,434,438,896 | 3,084,395,762 | 3,753,949,192 |
| After trimming sequences<br>(bp)                  | 3,460,047,409 | 3,119,844,627 | 2,670,567,764 | 3,487,610,285 |
| Total number of sequences<br>examined             | 12,356,363    | 11,332,513    | 10,136,401    | 12,375,977    |
| Total size of examined<br>sequences (bp)          | 3,450,011,112 | 3,111,973,483 | 2,662,086,408 | 3,479,909,293 |
| Total number of identified<br>SSRs                | 2,805,105     | 3,218,502     | 4,232,443     | 2,892,730     |
| Number of SSR containing<br>franking sequences    | 1,803,312     | 1,979,878     | 2,412,325     | 1,841,306     |
| Number of sequences<br>containing more than 1 SSR | 603,858       | 729,548       | 1,030,803     | 628,504       |
| Di-nucleotide                                     | 2,065,925     | 2,515,694     | 3,560,225     | 2,065,989     |
| Tri-nucleotide                                    | 275,480       | 253,883       | 230,434       | 319,490       |
| Tetra-nucleotide                                  | 415,295       | 399,537       | 392,783       | 454,810       |
| Penta-nucleotide                                  | 31,639        | 32,161        | 30,143        | 37,837        |
| Hexa-nucleotide                                   | 16,766        | 17,227        | 18,858        | 14,604        |

**Table S2.** Summary information of the 15 ms DNA markers developed of *Tachysurus fulvidraco*.

| Primer name | Length (mer) | SSR Type             | Amplicon Size (bp) |
|-------------|--------------|----------------------|--------------------|
| Pfu-P2-002  | 22           | (GT) <sub>10</sub>   | 152                |
| Pfu-P2-003  | 22           | (TG) <sub>19</sub>   | 187                |
| Pfu-P2-005  | 22           | (TG) <sub>15</sub>   | 202                |
| Pfu-P2-006  | 20           | (TG) <sub>14</sub>   | 205                |
| Pfu-P2-009  | 18           | (TC) <sub>15</sub>   | 241                |
| Pfu-P2-011  | 19           | (TC) <sub>14</sub>   | 253                |
| Pfu-P2-015  | 21           | (TG) <sub>20</sub>   | 279                |
| Pfu-P2-016  | 21           | (AC) <sub>16</sub>   | 280                |
| Pfu-P2-018  | 20           | (TC) <sub>20</sub>   | 293                |
| Pfu-P3-003  | 18           | (AGA) <sub>11</sub>  | 182                |
| Pfu-P3-004  | 18           | (AGA) <sub>20</sub>  | 185                |
| Pfu-P3-008  | 25           | (AAG) <sub>16</sub>  | 243                |
| Pfu-P4-001  | 22           | (TAAA) <sub>10</sub> | 128                |
| Pfu-P4-002  | 20           | (TAAA) <sub>9</sub>  | 128                |
| Pfu-P4-005  | 18           | (ATAC) <sub>7</sub>  | 197                |

**Table S3.** Summary of msDNA multiplex PCR set in *Tachysurus fulvidraco*.

| Microsatellite multiplex PCR set 1 |            |                           |                         |
|------------------------------------|------------|---------------------------|-------------------------|
| Dye                                | Name       | Forward sequence          | Reverse sequence        |
| FAM                                | Pfu-P2-002 | ACACGTAAGTGTATCTGTGC      | ACAGCCATGAGAGGAAGC      |
|                                    | Pfu-P2-015 | TGAAATCTATCAGTGGCTCCA     | CTAACTGCCATCTAACTGAGG   |
| HEX                                | Pfu-P2-006 | ACACTGGTTTGTGTGTAGC       | ACGCTGAACAATGGACA       |
|                                    | Pfu-P2-003 | ACCACACTTCTAAAAAGAAAATGTT | GCAAAAAATGAGCTGGCTGA    |
| TAMRA                              | Pfu-P2-009 | ACGACAGCGATAGGAGGT        | GGGAGGAAGGGAGTGATT      |
|                                    | Pfu-P2-018 | TACACAAACATGTCGAACGG      | AGATGCACTTGAAGGAACCT    |
| ATTO565                            | Pfu-P3-003 | ACCTCGTTTTCTGCTCA         | GCAGCCCTCCTGTTCTTC      |
|                                    | Pfu-P2-016 | TTGTTTCACAGATGTTTCGTG     | GACGACACAGGACTACTG      |
| Microsatellite multiplex PCR set 2 |            |                           |                         |
| Dye                                | Name       | Forward sequence          | Reverse sequence        |
| FAM                                | Pfu-P3-004 | AACGCACTACCTGTTCT         | GCCAATGCTGGATTGTGTC     |
|                                    | Pfu-P4-002 | ATCTGATTACGGGTCGAAAC      | GAGAGCCGCTACAACACT      |
| HEX                                | Pfu-P3-008 | TGGTTTGCTGCTGTGCT         | ATTCTGCCTGCATCTCA       |
|                                    | Pfu-P2-011 | AGAACACACAGGATTCAGC       | GCTAGTGTTAGTATCTTCCATCT |
| TAMRA                              | Pfu-P4-005 | TTGTCGTACGGACTGCTT        | AAGGCTTTTCCACCTGCA      |
|                                    | Pfu-P2-005 | TGTTCTGTCAAAGTAGAAGGTT    | AGCCATAGTGATCCTGAAC     |
| ATTO565                            | Pfu-P4-001 | CATTACACGCCTGTTTGTTTAC    | AGCGATGAATGATATCTTTGAAA |

**Table S4.** Polymorphism of genetic diversity information of msDNA loci in *Tachysurus fulvidraco*.

| Locus      | N   | N <sub>A</sub> | H <sub>O</sub> | H <sub>E</sub> | P <sub>IC</sub> | Null allele |
|------------|-----|----------------|----------------|----------------|-----------------|-------------|
| Pfu-P2-002 | 120 | 13             | 0.742          | 0.797          | 0.769           | X           |
| Pfu-P2-015 | 120 | 18             | 1.000          | 0.865          | 0.848           | X           |
| Pfu-P2-006 | 120 | 11             | 0.783          | 0.852          | 0.834           | X           |
| Pfu-P2-003 | 120 | 11             | 0.308          | 0.617          | 0.563           | X           |
| Pfu-P2-009 | 120 | 15             | 1.000          | 0.889          | 0.875           | X           |
| Pfu-P2-018 | 120 | 15             | 0.875          | 0.892          | 0.878           | X           |
| Pfu-P3-003 | 120 | 12             | 0.925          | 0.844          | 0.823           | X           |
| Pfu-P2-016 | 120 | 18             | 0.950          | 0.867          | 0.850           | X           |
| Pfu-P3-004 | 120 | 13             | 0.833          | 0.845          | 0.825           | X           |
| Pfu-P4-002 | 120 | 11             | 0.733          | 0.850          | 0.828           | X           |
| Pfu-P3-008 | 120 | 19             | 0.800          | 0.897          | 0.884           | X           |
| Pfu-P2-011 | 120 | 11             | 0.800          | 0.832          | 0.809           | X           |
| Pfu-P4-005 | 120 | 13             | 0.992          | 0.840          | 0.820           | X           |
| Pfu-P2-005 | 120 | 9              | 0.758          | 0.795          | 0.766           | X           |
| Pfu-P4-001 | 120 | 12             | 0.783          | 0.830          | 0.807           | X           |

N: Number of samples, N<sub>A</sub>: Number of alleles, H<sub>O</sub>: Observed heterozygosity, H<sub>E</sub>: Expected heterozygosity, P<sub>IC</sub>: Polymorphic information content.
